# Supplementary material for: A DFT study of the interaction between olefins and Cu2+ on silica and MCM-41 model surfaces
Source: Royal Society of Chemistry journal article supplement (doi:10.1039/c3dt53285b), 2014-01-01
Supplement: c3dt53285b1.pdf [file c3dt53285b1.pdf]

## Supporting Materials

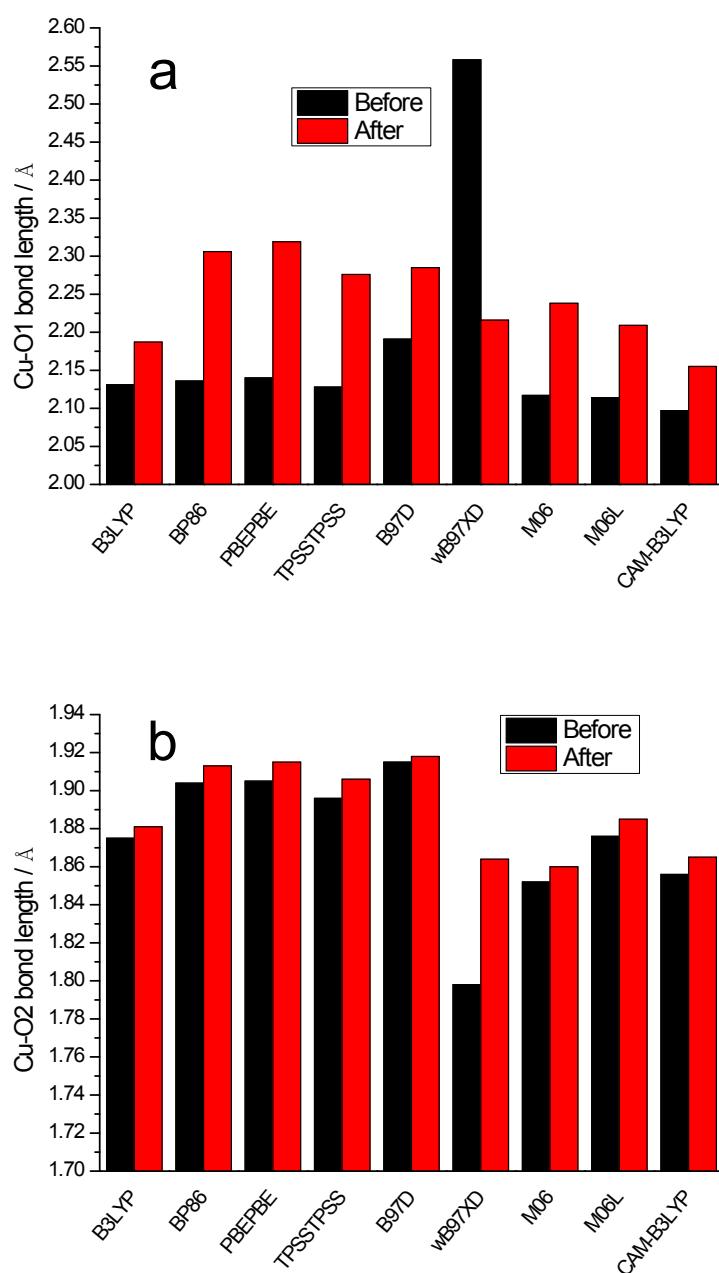

Figure S1. The bond length of Cu-O1 (a) and that of Cu-O2 (b) before and after the interaction calculated with the nine functionals using the mixed basis set 6-311+G(d,p)+LANL2DZ.

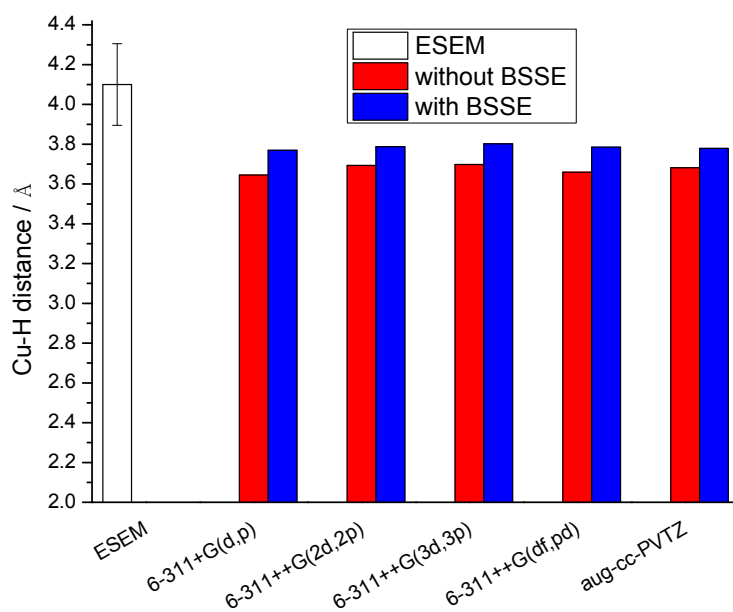

Figure S2. The calculated Cu-H distances by B3LYP using 6-311+G(d,p), 6-311++G(2d,2p), 6-311++G(3d,3p), 6-311++G(df,pd) and aug-cc-pVTZ with and without the BSSE correction.

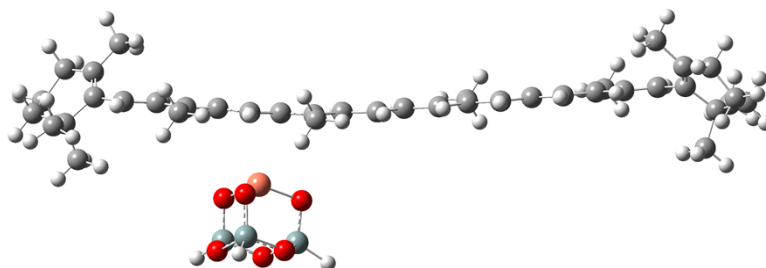

Figure S3. The optimized structure of  $\text{Cu}^{2+}$ -**I** with  $\text{Cu}^{2+}$  interacting with C11=C12 double bond, which is calculated by B3LYP with the BSSE correction using the mixed basis set (6-311+G(d) for Cu, 6-31G(d) for **I**, and the three oxygen atoms coordinated to  $\text{Cu}^{2+}$ , and 3-21G for the remaining atoms). H: light gray, O: red, Cu: orange and C: dark gray. Si: blue-gray.
